# Supplementary material
Source: PubMed Central journal article supplement (PMC10510685)
Supplement: Supp_TableS1.pdf [file Supp_TableS1.pdf]

**Supplementary Table 1. Items assessing cervical cancer screening awareness, knowledge, perceptions, and behaviors from the baseline questionnaire of the MBMT-3 clinical trial**

|                  | Item                                                                                                                                                                                                                                                                                               | Responses                                    | N missing <sup>a</sup> |
|------------------|----------------------------------------------------------------------------------------------------------------------------------------------------------------------------------------------------------------------------------------------------------------------------------------------------|----------------------------------------------|------------------------|
| <b>Awareness</b> | Have you ever heard of human papillomavirus, or HPV?                                                                                                                                                                                                                                               | Yes or no                                    | -                      |
|                  | Do you know about any clinics where you can get a free or low-cost Pap?                                                                                                                                                                                                                            | Yes or no                                    | -                      |
|                  | Have you heard of a new way to screen for cervical cancer where they test for HPV and do a Pap smear in the same visit?                                                                                                                                                                            | Yes or no                                    | -                      |
| <b>Knowledge</b> | Do you think HPV can cause herpes?                                                                                                                                                                                                                                                                 | Yes or no                                    | -                      |
|                  | Do you think HPV can cause cervical cancer?                                                                                                                                                                                                                                                        | Yes or no                                    | -                      |
|                  | I don't need a Pap smear unless I have abnormal bleeding.                                                                                                                                                                                                                                          | Agreement scale <sup>b</sup>                 | -                      |
|                  | Women who are done having kids don't need Pap smears anymore.                                                                                                                                                                                                                                      | Agreement scale                              | -                      |
|                  | Only women who have sex with many people need Pap smears.                                                                                                                                                                                                                                          | Agreement scale                              | -                      |
|                  | Do doctors recommend that healthy women your age should get cervical cancer screening: a.) Every 6 months, b.) Every year, c.) Every two years, d.) Every 3 to 5 years, e.) less often than that, or f.) do you not need to get cervical cancer screening [correct answer: d.) every 3 to 5 years] | Multiple choice                              | -                      |
|                  | If a cervical cancer screening test finds a problem, it can usually be treated.                                                                                                                                                                                                                    | Agreement scale                              | -                      |
|                  | As far as you know, what is a Pap smear for?                                                                                                                                                                                                                                                       | Open-ended                                   | -                      |
|                  | <b>Perceptions</b>                                                                                                                                                                                                                                                                                 | <b>Risk appraisal</b>                        |                        |
|                  | How worried are you about getting cervical cancer? <sup>c</sup>                                                                                                                                                                                                                                    | Severity scale <sup>d</sup>                  | 2                      |
|                  | Without regular screening, what do you think is the chance that you will get cervical cancer in the future? <sup>c</sup>                                                                                                                                                                           | Severity scale                               | 15                     |
|                  | I have almost no chance of getting cervical cancer. <sup>c</sup>                                                                                                                                                                                                                                   | Agreement scale                              | 28                     |
|                  | I can sense of my cervix is healthy. <sup>e</sup>                                                                                                                                                                                                                                                  | Agreement scale                              | 27                     |
|                  | I can tell when something is wrong with my cervix. <sup>e</sup>                                                                                                                                                                                                                                    | Agreement scale                              | 20                     |
|                  | If you got cervical cancer how much would it affect your life?                                                                                                                                                                                                                                     | Severity scale                               | 11                     |
|                  | Imagine you get screened for cervical cancer and it's painful. How much would you regret getting screened?                                                                                                                                                                                         | Severity scale                               | 4                      |
|                  | Imagine you don't get screened for cervical cancer and, in the future, you find out you have a cervical abnormality. How much would you regret not getting screened?                                                                                                                               | Severity scale                               | 2                      |
|                  | Personally, I do not need a Pap smear because I take good care of myself.                                                                                                                                                                                                                          | Agreement scale                              | 1                      |
|                  | There is very little a person can do to reduce her risk of cervical cancer.                                                                                                                                                                                                                        | Agreement scale                              | 42                     |
|                  | I would rather not know if I had cervical cancer.                                                                                                                                                                                                                                                  | Agreement scale                              | 5                      |
|                  | <b>Screening perceptions</b>                                                                                                                                                                                                                                                                       |                                              |                        |
|                  | The responsible thing to do is to get regular cervical cancer screening. <sup>f</sup>                                                                                                                                                                                                              | Agreement scale                              | 0                      |
|                  | It is important to get cervical cancer screening so that I will know if anything is wrong with me. <sup>f</sup>                                                                                                                                                                                    | Agreement scale                              | 0                      |
|                  | I trust Pap smears to give accurate information about my health. <sup>f</sup>                                                                                                                                                                                                                      | Agreement scale                              | 3                      |
|                  | Cervical cancer screening is physically uncomfortable. <sup>g</sup>                                                                                                                                                                                                                                | Agreement scale                              | 40                     |
|                  | Cervical cancer screening is embarrassing. <sup>g</sup>                                                                                                                                                                                                                                            | Agreement scale                              | 8                      |
|                  | Getting screened will lower my chances of getting cervical cancer                                                                                                                                                                                                                                  | Agreement scale                              | 9                      |
|                  | When you think about getting cervical cancer screening, how nervous does it make you?                                                                                                                                                                                                              | 3-pt scale: "not at all," "somewhat," "very" | 0                      |
|                  | <b>Stigma</b>                                                                                                                                                                                                                                                                                      |                                              |                        |
|                  | If I had cervical cancer, people would think I slept around.                                                                                                                                                                                                                                       | Agreement scale                              | 7                      |
| <b>Behaviors</b> | <b>Screening intent</b>                                                                                                                                                                                                                                                                            |                                              |                        |
|                  | In the past year, how much have you thought about getting a Pap smear?                                                                                                                                                                                                                             | Severity scale                               | 0                      |
|                  | I will eventually get screened for cervical cancer, but I have other health priorities right now.                                                                                                                                                                                                  | Agreement scale                              | 10                     |
|                  | I am sure I can get cervical cancer screening if I want to.                                                                                                                                                                                                                                        | Agreement scale                              | 15                     |
|                  | <b>Seeking screening</b>                                                                                                                                                                                                                                                                           |                                              |                        |
|                  | In the past year, have you tried to get a Pap smear?                                                                                                                                                                                                                                               | Yes or no                                    | 0                      |

<sup>a</sup> For Awareness and Knowledge questions, responses of "Don't know" and "Refused" were coded as "not correct" and therefore there are no missing responses. For Perceptions and Behaviors questions, mean imputation was used to impute missing responses.

<sup>b</sup> Agreement scale (4-point scale): "Strongly agree", "somewhat agree", "somewhat disagree", and "strongly disagree".

<sup>c</sup> Included in 3-item "Perceived risk of cervical cancer" scale. Scales created via exploratory factor analysis with Cronbach's  $\alpha \geq 0.6$ .

<sup>d</sup> Severity scale (4-point scale): "None/not at all", "a little", "a moderate amount", and "a lot/very".

<sup>e</sup> Included in the 2-item "Embodiment of risk" scale.

<sup>f</sup> Included in the 3-item "Positive perceptions of screening" scale.

<sup>g</sup> Included in the 2-item "Negative perceptions of screening" scale.
